# Supplementary material for: EphrinA1-EphA2 Signal Induces Compaction and Polarization of Madin-Darby Canine Kidney Cells by Inactivating Ezrin through Negative Regulation of RhoA
Source: PubMed Central journal article supplement — J Biol Chem. 2011 Oct 6;286(51):44243–53. doi: 10.1074/jbc.M111.267047 (PMC3243524; doi:10.1074/jbc.m111.267047), 2011-10-06
Supplement: supp_M111.267047_jbc.M111.267047-1.pdf [file supp_M111.267047_jbc.M111.267047-1.pdf]

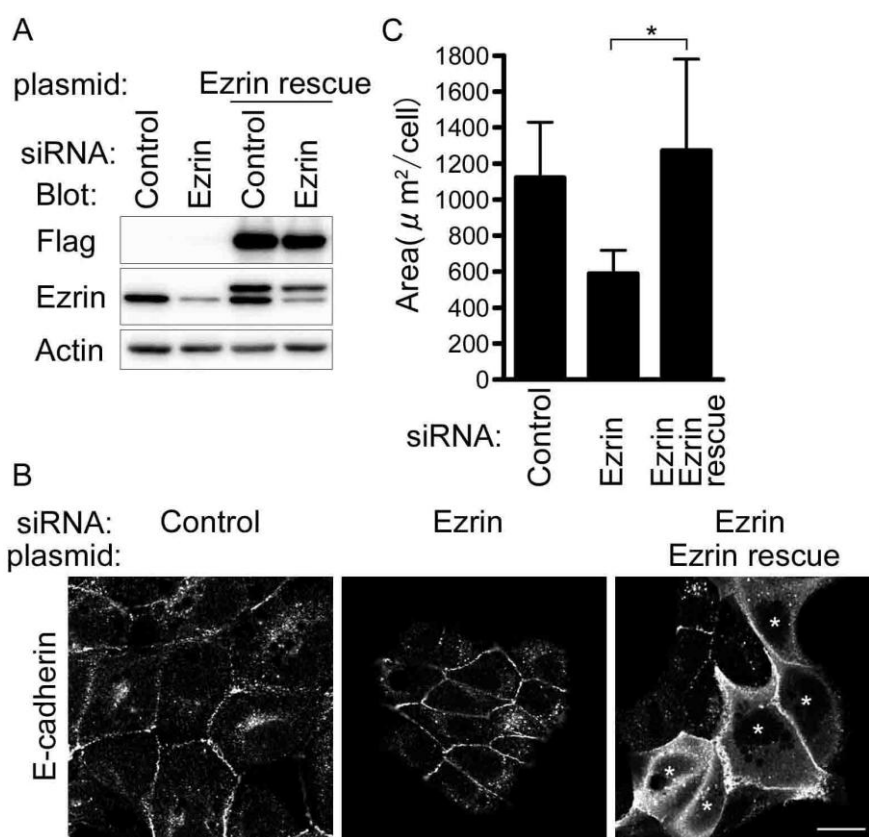

Supplementary Figure S1

Supplementary Figure S1. **Expression of a mutant Ezrin resistant to siRNA for WT Ezrin reverses the morphological change induced by depletion of Ezrin.** (A) Immunoblot analyses with the antibodies indicated at the left using the lysates of the MDCK cells treated with control siRNA or Ezrin siRNA and transfected with the plasmid expressing Flag-tagged mutant Ezrin. (B) The confocal XY image of the MDCK cells transfected with siRNAs and plasmids indicated at the top were immunostained with anti-E-cadherin. Note that the cells immunostained with anti-Flag (marked by the asterisks) remain flat even after the cells were transfected with siRNA for Ezrin. (C) Area of the XY plane image of the cells immunostained with anti-E-cadherin was measured quantitatively as described in the experimental procedure.

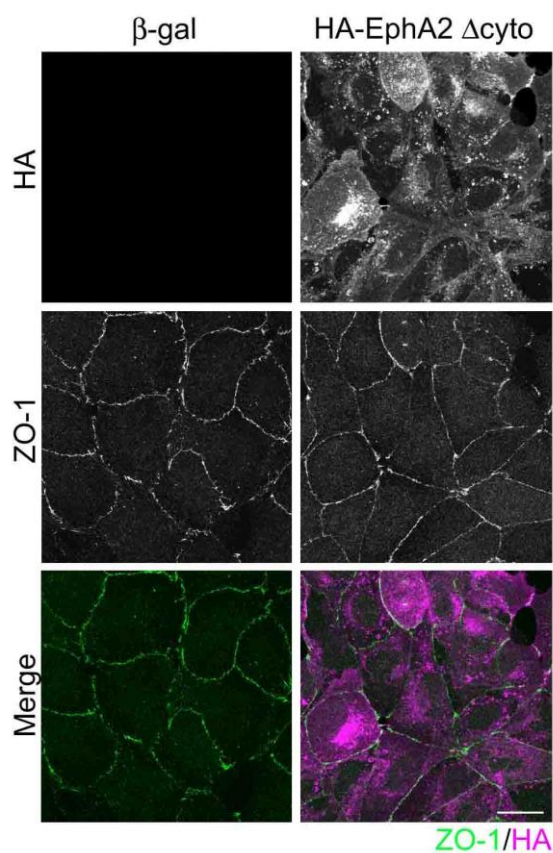

Supplementary Figure S2

Supplementary Figure S2. **Infection of adenovirus expressing HA-tagged mutant EphA2 lacking the cytoplasmic domain.** MDCK cells infected with either adenovirus-expressing  $\beta$ -galactosidase ( $\beta$ -gal) or that expressing HA-tagged EphA2 lacking cytoplasmic domain (HA-EphA2  $\Delta$  cyto) were immunostained with anti-ZO-1 and anti-HA. The images are shown as a projection image of stacked XY images. Note that all of the cells were infected using the adenovirus as confirmed by the immunoreactivity for HA (right panel).

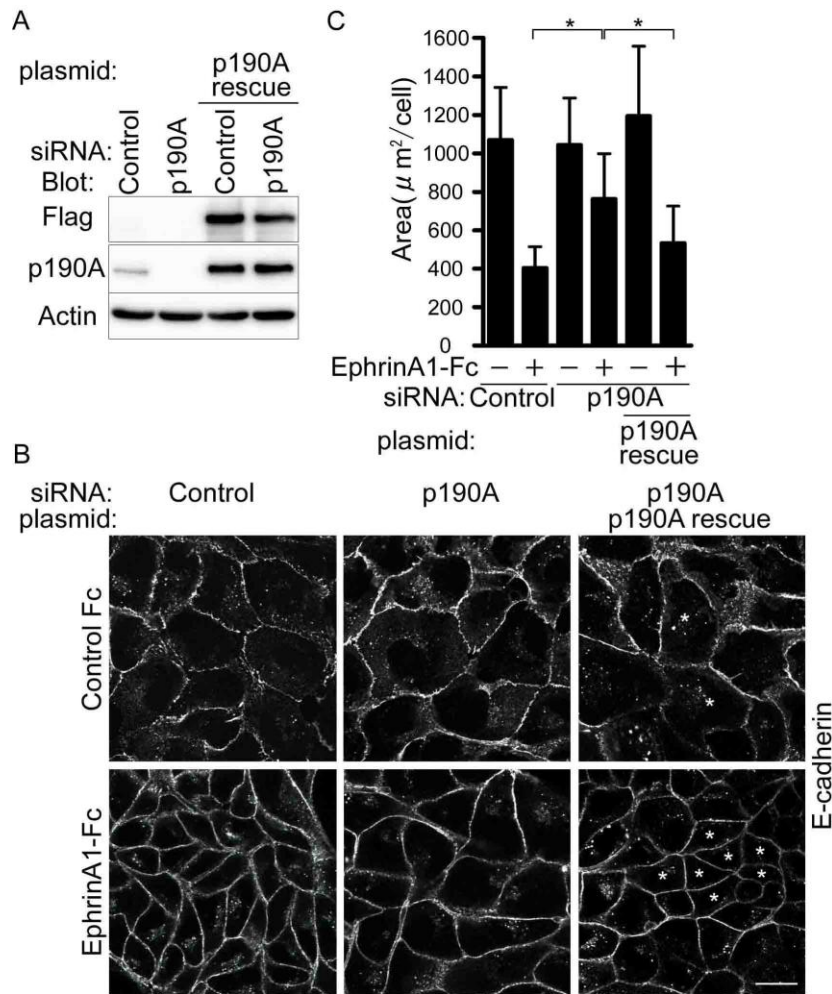

Supplementary Figure S3

**Supplementary Figure S3. Expression of a mutant resistant to siRNA for p190RhoGAP-A reverses the morphological change induced by depletion of p190RhoGAP-A.** (A) Immunoblot analyses of the cell lysates from the MDCK cells transfected with siRNAs (control or p190RhoGAP-A siRNA (p190A)) and plasmids expressing Flag-tagged mutant p190RhoGAP-A (p190A rescue) indicated at the top using the antibodies indicated at the left. (B) Confocal images of the MDCK cells transfected with siRNA and rescue plasmid indicated at the top immunostained with anti-E-cadherin. (C) Area of individual cell of the XY image in B was analyzed as described in the legend of Fig. 1D. Note that MDCK cells treated with p190RhoGAP-A siRNA and transfected with the rescue plasmid expressing p190RhoGAP-A resistant to siRNA exhibited compaction in response to ephrinA1-Fc stimulation.
